## Dysregulated miR34a/diacylglycerol kinase $\zeta$ interaction enhances T-cell activation in acquired aplastic anemia

Yuan-xin Sun<sup>1</sup>, Hui Li<sup>2</sup>, Qi Feng<sup>1</sup>, Xin Li<sup>1</sup>, Ying-yi Yu<sup>1</sup>, Li-wei Zhou<sup>1</sup>, Yan Gao<sup>1</sup>, Guo-sheng Li<sup>3</sup>, Juan Ren<sup>4</sup>, Chun-hong Ma<sup>5</sup>, Cheng-jiang Gao<sup>5</sup>, Jun Peng<sup>1,6</sup>

<sup>1</sup>Department of Hematology, Qilu Hospital, Shandong University, Jinan, China

<sup>2</sup>Department of Rheumatology, People's Hospital of Bao'an, Shenzhen, China

<sup>3</sup>Shandong Provincial Key Laboratory of Immunohematology, Qilu Hospital, Shandong University, Jinan, China

<sup>4</sup>Department of Hematology, First Affiliated Hospital, Xi'an Jiaotong University, Xi'an, China

<sup>5</sup>Department of Immunology, Shandong University School of Medicine, Jinan, China

<sup>6</sup>Key Laboratory of Cardiovascular Remodeling and Function Research, Chinese Ministry of Education and Chinese Ministry of Health, Jinan, China

**Correspondence to:** Jun Peng, **email:** junpeng88@sina.com.cn

**Keywords:** aplastic anemia, miR34a, diacylglycerol kinase  $\zeta$ , T cells

**Received:** November 18, 2016

**Accepted:** December 13, 2016

**Published:** December 20, 2016

### ABSTRACT

Acquired aplastic anemia is an idiopathic paradigm of human bone marrow failure syndrome, which involves active destruction of hematopoietic stem cells and progenitors by cytotoxic T cells in the bone marrow. Aberrant expression of microRNAs in T cells has been shown to lead to development of certain autoimmune diseases. In the present study, we performed a microarray analysis of miRNA expression in bone marrow CD3<sup>+</sup> T cells from patients with aplastic anemia and healthy controls. Overexpression of miR34a and underexpression of its target gene diacylglycerol kinase (DGK)  $\zeta$  in bone marrow mononuclear cells were validated in 41 patients and associated with the severity of aplastic anemia. Further, the level of miR34a was higher in naïve T cells from patients than from controls. The role of miR34a and DGK $\zeta$  in aplastic anemia was investigated in a murine model of immune-mediated bone marrow failure using miR34a<sup>-/-</sup> mice. After T-cell receptor stimulation *in vitro*, lymph node T cells from miR34a<sup>-/-</sup> mice demonstrated reduced activation and proliferation accompanied with a less profound down-regulation of DGK $\zeta$  expression and decreased ERK phosphorylation compared to those from wild-type C57BL6 control mice. Infusion of  $5 \times 10^6$  miR34a<sup>-/-</sup> lymph node T cells into sublethally irradiated CB6F1 recipients led to increased Lin<sup>-</sup>Sca1<sup>+</sup>CD117<sup>+</sup> cells and less vigorous expansion of CD8<sup>+</sup> T cells than injection of same number of wild-type lymph node cells. Our study demonstrates that the miR34a/DGK $\zeta$  dysregulation enhances T-cell activation in aplastic anemia and targeting miR34a may represent a novel molecular therapeutic approach for patients with aplastic anemia.

### INTRODUCTION

Acquired aplastic anemia (AA) is an idiopathic paradigm of human bone marrow failure syndromes, characterized by bone marrow (BM) aplasia and peripheral blood pancytopenia. Patients with AA often present with symptoms of anemia, hemorrhage, and frequent infection. The pathophysiology of AA remains unclear, but in most cases AA behaves as an immune-mediated disease in

which the cytotoxic T lymphocytes destroy hematopoietic stem/progenitor cells in the bone marrow [1–3]. Up-regulation of CD3 gene expression in AA patients suggests that T cells may be receiving sustained stimulation signaling that leads to inappropriate T cell activation [4]. The responsiveness of AA patients to immunosuppressive therapy with anti-thymocyte globulin and cyclosporine strongly support the underlying immune pathogenesis [5, 6]. A large amount of laboratory data also provided

evidence for the pivotal role of the immune system in the disease pathophysiology [7]. Nevertheless, the existing data does not completely explain the mechanism of effector T cells involved in AA.

MicroRNAs (miRNAs) are small conserved non-coding RNAs that negatively modulate the expression of complementary genes. Over 60% of the human coding genes are estimated to be under miRNA control, and a single microRNA can potentially regulate hundreds of target genes [8–11]. miRNAs have been shown to be important regulators of immune homeostasis and their aberrant expression was found in some autoimmune diseases, such as miR155 and miR146a in rheumatoid arthritis, and miR145 and miR224 in lupus erythematosus [12–14]. Hosokawa et al. reported that expression of four miRNAs (miR126-3p, miR145-5p, miR199a-5p, and miR223-3p) were decreased in peripheral blood T cells of AA patients [15]. However, information regarding miRNA regulation in BM T cells of AA patients is lacking.

Bone marrow microenvironment is the place hematopoietic stem cells are attacked by immune cells in AA. Previously, we demonstrated that elevated expression of CX3C chemokine receptor 1 mediated recruitment of T cells into the bone marrow of patients with AA [16]. Maciejewskiet al. proposed that BM phenotyping was more sensitive than peripheral blood analysis for detecting the abnormal cellular immune response in AA, since the percentage of activated CD8<sup>+</sup> cells were more easily detected in BM than in peripheral blood from AA patients [17]. Thus, in the present study, we performed a microarray analysis of the miRNA expression patterns in BM CD3<sup>+</sup> T cells of AA patients and healthy controls to screen for miRNAs differentially expressed in AA. The miRNAs level between AA and controls were verified by quantitative real time-polymerase chain reaction (RT-PCR) in 41 patients and 20 healthy individuals. Notably, miR34a expression was higher in all the 41 patients than in healthy controls.

miR34a has been identified as a direct transcriptional target of p53 [18, 19]. Similar to the p53 tumor suppressor gene, miR34a inhibits cell proliferation and induces apoptosis. However, the function of miR34a in hematopoiesis and the immune response is largely unknown. Of note, Shin et al. demonstrated that miR34a directly targets diacylglycerol kinase (DGK)  $\zeta$  via its seed matches in both coding region and 3' untranslated region by the way of luciferase reporter assay [20]. DGK $\zeta$  is a member of the DGK family that catalyzes conversion of diacylglycerol (DAG), a crucial second messenger of receptor-mediated signaling in T cell activation, to phosphatidic acid. In T cells DAG is required for activation of diverse downstream signaling cascades, including the Ras-extracellular signal regulated kinase (Ras-ERK) and nuclear factor- $\kappa$ B pathways. Through phosphorylation of DAG, DGK $\zeta$  terminates or inhibits downstream signaling, thus controlling DAG in T cell activation. The

role of DGK $\zeta$  in T cell receptor (TCR) signaling has been investigated in both cell lines and murine models [21–23]. However, whether DGK $\zeta$  participates in the pathogenesis of AA was previously unknown.

Therefore, in the present study, we first identified and characterized the overexpressed miR34a and its corresponding target gene DGK $\zeta$  in T cells of AA patients. We then generated a murine model of bone marrow failure and explored the possible roles of miR34a and DGK $\zeta$  in T cell activation in AA. Our findings indicate for the first time that dysregulated miR34a/DGK $\zeta$  interaction plays a critical role in the abnormal T cell immunity in AA and provide a base for developing new therapeutic target for AA.

## RESULTS

### miRNA expression profiles in BM T cells from AA patients and healthy controls

Among the 1105 hsa-miRNAs, we identified 31 miRNAs with significantly differential expression between three SAA patients and three healthy individuals. Of these, 16 were overexpressed and 15 were underexpressed in disease vs health. Figure 1 depicts a heat map illustrating the differentially expressed miRNAs in either direction. Differential expression analysis between the two groups was analyzed based on the criteria of fold-change  $\geq 1.5$  and  $P$  value  $< 0.05$ . The microarray data described in this report have been deposited in NCBI's Gene Expression Omnibus (<http://www.ncbi.nlm.nih.gov/geo/>) and are accessible through Gene Expression Omnibus Series accession number GSE82095.

### miR34a overexpression in bone marrow mononuclear cells (BMMCs) is associated with the severity of AA

The differentially expressed miRNAs were examined further by RT-PCR in BMMCs from 41 AA patients and 20 healthy controls. The expression of miR34a in the SAA and MAA groups were both significantly higher than in healthy controls ( $12.6 \pm 9.44 \times 10^{-4}$  vs  $5.63 \pm 3.17 \times 10^{-4}$  vs  $0.74 \pm 0.48 \times 10^{-4}$ ;  $P < 0.001$  for the two comparisons; Figure 2A). In addition, miR34a expression was associated with AA severity, higher in the SAA group than in the MAA group ( $P = 0.002$ ; Figure 2A). Negative correlations between miR34a levels and peripheral blood neutrophil or reticulocyte counts were observed in AA patients ( $r = -0.472$ ,  $P = 0.002$ ;  $r = -0.475$ ,  $P = 0.002$ ; Figure 2B–2C). We found no significant correlations with peripheral red blood cell count, lymphocyte count, or platelet count (Supplementary Figure S1). Besides, the level of miR34a in naïve T cells and non-naïve T cells from AA patients was both much higher than from healthy controls (naïve T cells:  $9.66 \pm 6.81 \times 10^{-4}$  vs  $0.69 \pm 0.52 \times 10^{-4}$ ,  $P = 0.007$ ; non-naïve T cells:  $11.32 \pm 7.01$

$\times 10^{-4}$  vs  $0.63 \pm 0.44 \times 10^{-4}$ ,  $P = 0.003$ ; Figure 2D) and no significance were observed between naïve T cells and non-naïve T cells.

### DGK $\zeta$ is downstream target gene of miR34a in BMMCs from AA patients

Referring to previous studies [24, 25] and using a target prediction and validation program, miRWalk 2.0 [26], we chose 7 potential target genes of miR34a to examine further in AA patients and healthy individuals. These genes included Kruppel-like factor 4 (KLF4), lymphoid enhancer binding factor 1 (LEF1), SPI-1 proto-

oncogene (SPI1), nuclear receptor subfamily 4 group A member 2 (NR4A2), sirtuin 1 (SIRT1), cyclin-dependent kinase 6 (CDK6), and DGK $\zeta$ . Expression of the first 6 potential target genes was not different between the two groups (Supplementary Figure S2). However, DGK $\zeta$  mRNA levels were significantly reduced in AA patients compared to controls ( $0.00277 \pm 0.00173$  vs  $0.00649 \pm 0.00222$ ;  $P < 0.001$ ; Figure 2E) and negatively correlated with miR34a levels ( $r = -0.662$ ,  $P < 0.001$ ; Figure 2F). Immunoblot analysis confirmed the low expression of DGK $\zeta$  in the BMMCs of AA patients (Figure 2G).

DGK $\zeta$  has been demonstrated to be a direct target of miR34a and to play an important role in T cell

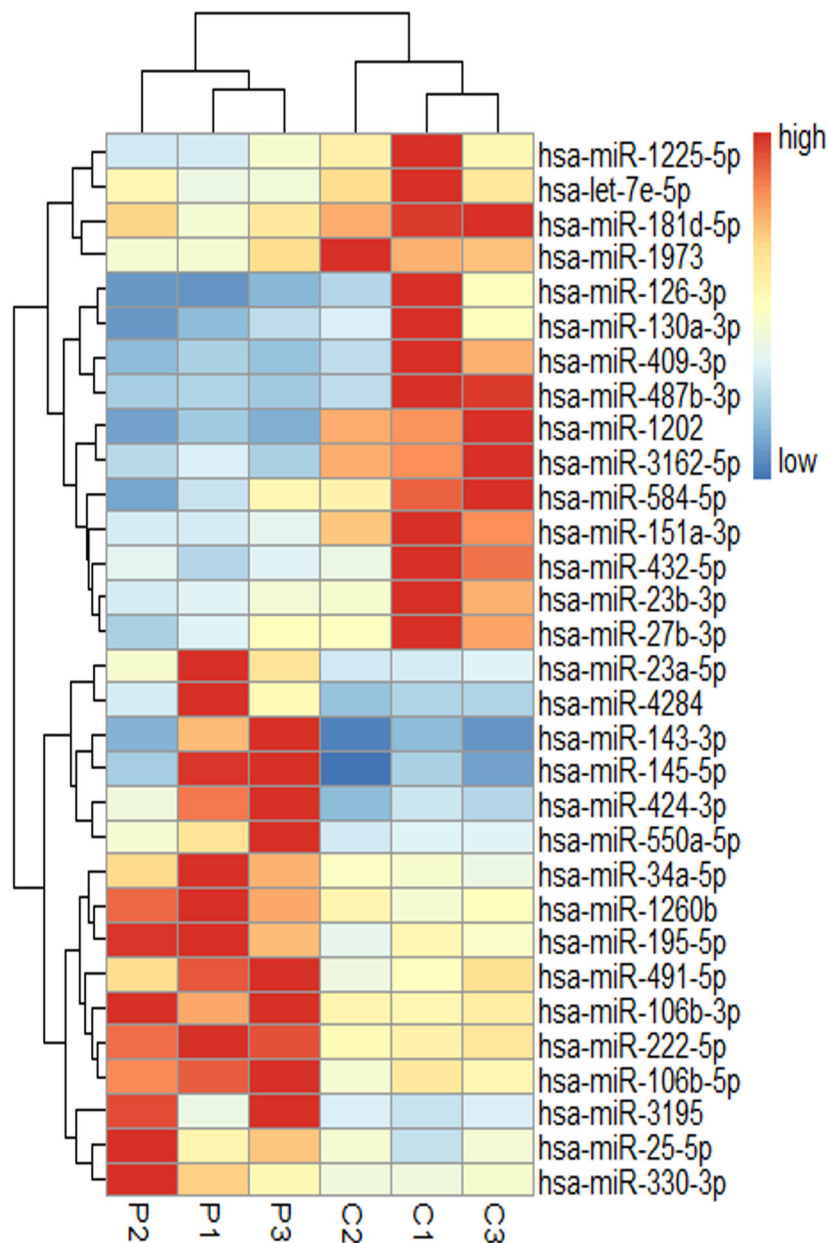

**Figure 1: miRNA expression profiles in BM T cells of SAA patients and controls.** P indicates SAA patients ( $n = 3$ ), C is controls ( $n = 3$ ). miRNA are in rows, samples in columns. For each miRNA, red represents an expression value higher than the average expression across all samples, blue represents an expression value below average.

activation [20]. Thus, we measured the T cell activation marker CD69 on BMMCs by flow cytometry. The proportion of surface CD69<sup>+</sup> cells among CD4<sup>+</sup> or CD8<sup>+</sup> BMMCs in AA patients was significantly higher than in controls (CD4<sup>+</sup> cells:  $8.90 \pm 3.28$  vs  $5.59 \pm 2.05$ ,  $P = 0.027$ ; CD8<sup>+</sup> cells:  $34.09 \pm 11.10$  vs  $15.34 \pm 4.3$ ,  $P < 0.001$ , respectively; Figure 2H). Taken together, the altered expression of the miR34a and its predicted target DGK $\zeta$  in BMMCs, especially the high miR34a level at the naïve T cell stage before T cell differentiation and activation in AA, suggest an active role of the miR34a-DGK $\zeta$ -T cell activation signaling in the pathogenesis of AA.

### miR34a down-regulation decreases activation of T cells from AA patients

To explore the effect of miR34a on T cell activation and growth, BMMCs from AA patients were transfected with lentivirus carrying miR34a inhibitor sequences (LV3-miR34a inhibitor) or non-specific sequences (LV3-NC). RT-PCR was used to confirm reduced miR34a expression and inversed expression of miR34a and DGK $\zeta$

in the miR34a inhibitor-transfected group. Five days after transfection, percentage of green fluorescent protein (GFP)-expressing cells in the two groups was similar, approximately 35% (Figure 3A). The CD4<sup>+</sup> and CD8<sup>+</sup> cells were gated among the GFP-expressing cells by flow cytometry. The CD4<sup>+</sup> or CD8<sup>+</sup> cells transfected with LV3-miR34a inhibitor expressed less CD69 and CD25, the T cell activation marker, than those transfected with LV3-NC, as indicated by percentage of CD69<sup>+</sup> cells and the mean fluorescence intensity of CD25 (Figure 3B–3E). These data showed miR34a-down-regulated T cells from AA patients expressed lower CD69 and CD25 with a weakly activated state.

### Lymphohematopoietic cellularity in miR34a-deficient mice

The effect of miR34a deficiency on mouse lymphohematopoiesis was analyzed by comparing the cellular composition in blood, BM, spleen, and lymph node between miR34a<sup>-/-</sup> and wild-type mice. In peripheral blood, miR34a<sup>-/-</sup> mice showed no significant

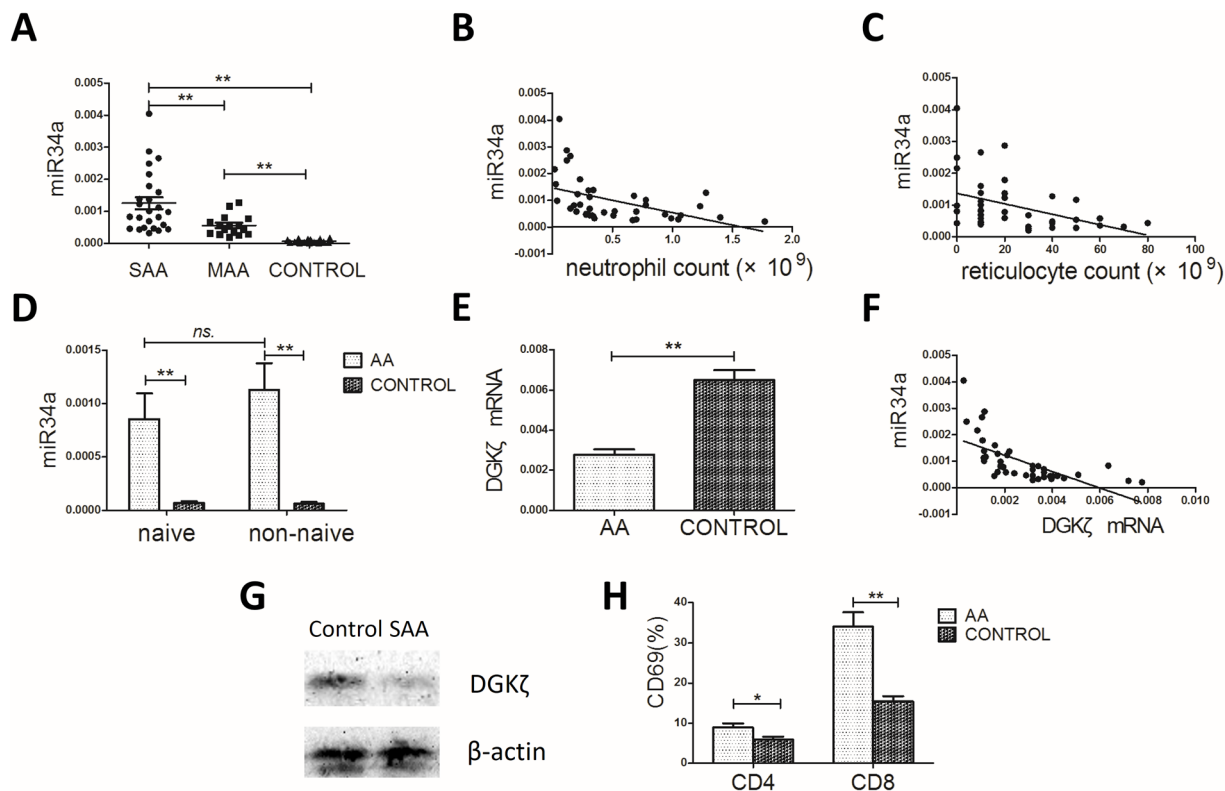

**Figure 2: miR34a, DGK $\zeta$  and CD69 expression in the AA patients and controls.** (A) miR34a expression in AA patients ( $n = 41$ ) was much higher than in controls ( $n = 20$ ), while in SAA group ( $n = 25$ ) it's much higher than in MAA group ( $n = 16$ ) (one-way ANOVA, with LSD post-test). (B, C) Correlations between miR34a level and peripheral blood neutrophil count or reticulocyte count in the 41 AA patients (Spearman's test). (D) miR34a expression in naïve T and non-naïve T cells from SAA patients ( $n = 8$ ) and controls ( $n = 8$ ). (E) DGK $\zeta$  mRNA level in BMMCs (Student's  $t$ -tests). (F) Negative correlation between DGK $\zeta$  mRNA level and miR34a level in AA patients (Spearman's test). (G) The representative data of DGK $\zeta$  protein expression in BMMCs from SAA patients ( $n = 8$ ) and controls ( $n = 8$ ). (H) The proportion of surface CD69<sup>+</sup> cells among CD4<sup>+</sup> and CD8<sup>+</sup> BMMC in AA patients and controls (Student's  $t$ -tests). Mean  $\pm$  SEM. \* $P < 0.05$ ; \*\* $P < 0.01$ .

change in white blood cell, red blood cell, and platelet counts compared to wild-type mice. In BM, the total number of BM cells and BM Lin<sup>-</sup>Sca1<sup>+</sup>CD117<sup>+</sup> (LSK) hematopoietic stem and progenitor cells [27] were similar between miR34a<sup>-/-</sup> and wild-type mice. We specifically analyzed the proportions of CD4<sup>+</sup> and CD8<sup>+</sup> T cells from peripheral blood, BM, lymph nodes, and spleen. Deletion of miR34a resulted in a mild decrease in CD4<sup>+</sup> cells in peripheral blood and BM, and had no major effect on other lymphohematopoietic cell types (Table 1).

### miR34a deficiency attenuates T cell activation and DGKζ down-regulation in response to TCR stimulation

To study the effect of miR34a deficiency on T cell activation, we stimulated lymph node (LN) cells and splenocytes from miR34a-deficient and wild-type mice with anti-CD3 and anti-CD28 mAbs for 18 h. CD4<sup>+</sup> and CD8<sup>+</sup> LN cells from miR34a<sup>-/-</sup> mice expressed lower levels of CD69 and CD25 than those from wild-type mice (CD69: 53.99 ± 19.86% vs 81.90 ± 6.27%, *P* = 0.017 for CD4<sup>+</sup> cells, and 47.98 ± 26.97% vs 82.29 ± 8.22%, *P* = 0.008 for CD8<sup>+</sup> cells, respectively; CD25:

48.63 ± 16.93% vs 68.5 ± 10.08%, *P* = 0.043 for CD4<sup>+</sup> cells, and 20.44 ± 15.29% vs 60.5 ± 22.83%, *P* = 0.012 for CD8<sup>+</sup> cells, respectively; Figure 4A–4D). The results were qualitatively similar but less notable in the CD4<sup>+</sup> and CD8<sup>+</sup> splenocytes.

In the wells without stimulation, DGKζ mRNA levels were not significantly different between miR34a<sup>-/-</sup> and wild-type cells. In the wells with stimulation, DGKζ expression declined in both groups. In miR34a<sup>-/-</sup> LN cells, DGKζ mRNA levels decreased to a lesser extent than in wild-type cells (0.869 ± 0.254 fold vs 0.357 ± 0.184 fold, *P* = 0.008, Figure 4E). The protein level of DGKζ was consistent with the declined mRNA level after stimulation in the two groups (Figure 4F).

It has been demonstrated that DGKζ negatively regulates TCR signaling by selectively interfering with the Ras-ERK pathway [21, 28], while miR34a can negatively control DGKζ expression during T cell activation. Therefore, we assayed activated ERK to investigate the effect of miR34a deficiency on TCR-induced Ras-ERK activation and found decreased ERK phosphorylation in miR34a-deficient LN T cells compared with that of wild-type LN T cells after TCR ligation (Figure 4G).

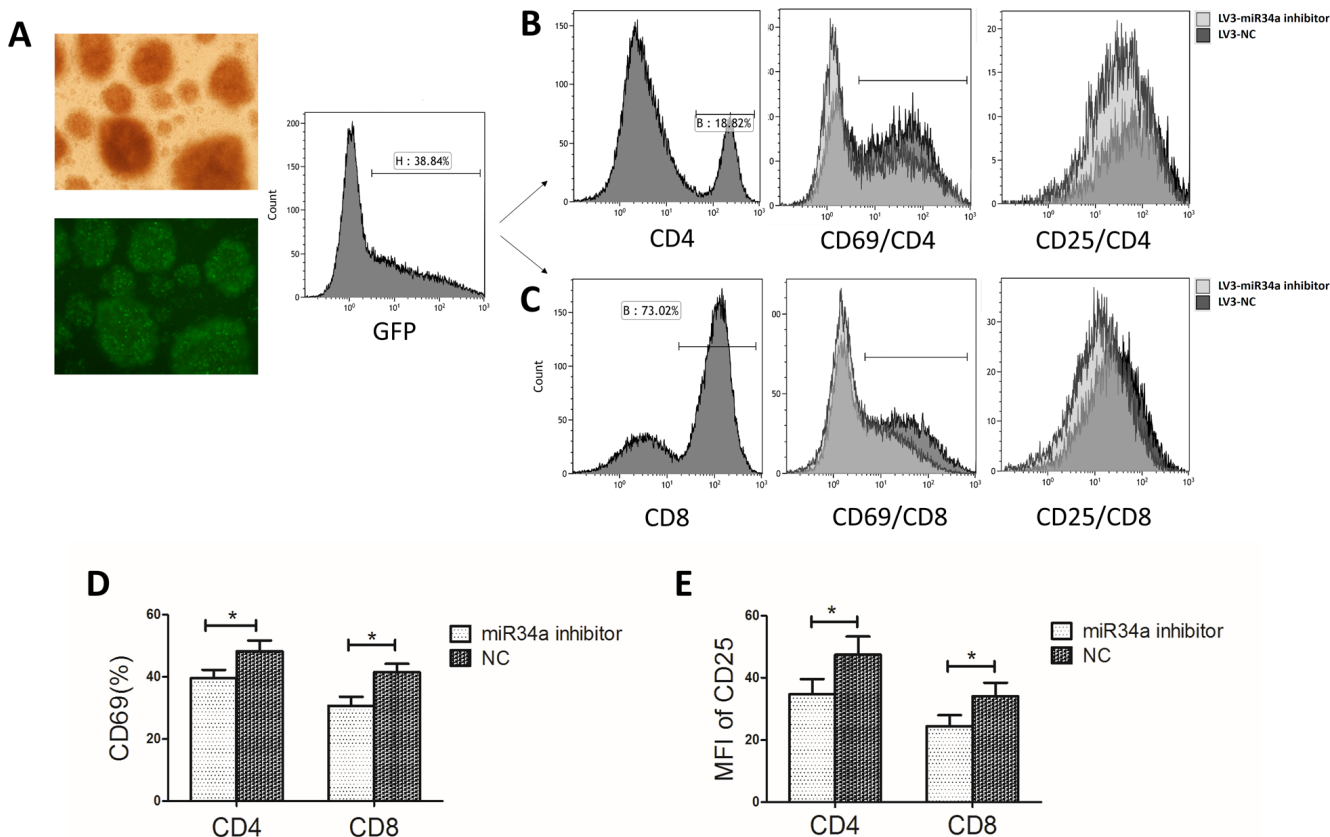

**Figure 3: T cell activation after transfection with miR34a inhibitor into BMMCs from ten randomly selected AA patients.** (A) BMMCs from one AA patient transfected with LV3-miR34a inhibitor and LV3-NC. GFP<sup>+</sup> cells were shown in the left panel (original magnification 100 ×). The histogram of flow cytometry showed the transfection rate. (B–E) CD4<sup>+</sup> and CD8<sup>+</sup> cells were gated from the GFP<sup>+</sup> cells. The CD69 and CD25 level on CD4<sup>+</sup> or CD8<sup>+</sup> cells transfected with LV3-miR34a inhibitor and LV3-NC were presented as the four merged histograms (B, C) and means with SEMs (D, E; Paired sample *t*-test). \**P* < 0.05.

**Table 1: Cellular composition in wild-type and miR34a<sup>-/-</sup> mice**

| Measurements               | WT           | miR34a <sup>-/-</sup> | <i>P</i> |
|----------------------------|--------------|-----------------------|----------|
| N(M+F)                     | 5 + 5 = 10   | 6 + 6 = 12            |          |
| <b>Peripheral blood</b>    |              |                       |          |
| WBC, ×10 <sup>9</sup> /L   | 12.6 ± 3.90  | 11.6 ± 2.47           | 0.463    |
| RBC, ×10 <sup>12</sup> /L  | 10.1 ± 1.59  | 9.62 ± 1.24           | 0.453    |
| PLT, ×10 <sup>9</sup> /L   | 1211 ± 214.8 | 1236 ± 217.0          | 0.783    |
| CD4, %                     | 14.4 ± 2.09  | 11.4 ± 1.78           | 0.018    |
| CD8, %                     | 8.40 ± 1.20  | 6.83 ± 2.03           | 0.112    |
| <b>Bone marrow</b>         |              |                       |          |
| BM cells, ×10 <sup>7</sup> | 21.86 ± 1.48 | 21.18 ± 1.16          | 0.493    |
| LSK, ×10 <sup>5</sup>      | 8.34 ± 1.52  | 10.81 ± 1.78          | 0.088    |
| CD4, %                     | 3.52 ± 0.50  | 2.10 ± 0.26           | 0.002    |
| CD8, %                     | 3.53 ± 1.44  | 2.30 ± 0.71           | 0.178    |
| <b>Spleen</b>              |              |                       |          |
| CD4, %                     | 23 ± 3.67    | 19.3 ± 1.12           | 0.063    |
| CD8, %                     | 12.78 ± 3.43 | 12.36 ± 2.05          | 0.820    |
| <b>Lymph nodes</b>         |              |                       |          |
| CD4, %                     | 36.33 ± 3.41 | 34.45 ± 9.13          | 0.618    |
| CD8, %                     | 23.45 ± 3.72 | 28.29 ± 4.75          | 0.069    |

Mean ± SD after *t* test. BM, bone marrow; RBC, red blood cells; WBC, white blood cells; PLT, platelets; LSK, Lin<sup>-</sup>Sca1<sup>+</sup>CD117<sup>+</sup> cells. Total BM cells were calculated assuming bilateral tibias, ilia, and unilateral femur contain 25% of total marrow cells.

Collectively, these data indicate that after TCR stimulation miR34a deficiency induces a less profound down-regulation of DGK $\zeta$  expression, suppresses TCR-mediated ERK activation and decreases the expression of T cell activation marker CD69 and CD25.

### miR34a-deficient T cells are hypoproliferative

Next, we assessed the effect of miR34a deficiency on T cell proliferation. miR34a-deficient CD4<sup>+</sup> and CD8<sup>+</sup> LN T cells showed reduced 5-Bromo-2-deoxyuridine (BrdU) incorporation compared with that of wild-type cells after stimulation with anti-CD3 and anti-CD28 mAbs (CD4<sup>+</sup> cells: 37.8 ± 4.88% vs 49.2 ± 8.62%, *P* = 0.019; CD8<sup>+</sup> cells: 41.9 ± 12.7% vs 58.5 ± 8.31%, *P* = 0.023; Figure 5A, 5C).

We also labeled T cells with carboxyfluorescein diacetate succinimidyl ester (CFSE) to trace cell division. CD8<sup>+</sup> miR34a-deficient T cells divided more slowly than wild-type T cells (54.3 ± 9.61% vs 75.2 ± 10.4%, *P* = 0.039; Figure 5B, 5D). No significant difference was

observed in CD4<sup>+</sup> cells although the tendency was similar to that of CD8<sup>+</sup> cells (45.6 ± 8.53% vs 53.1 ± 7.29%, *P* > 0.05; Figure 5B, 5D).

### miR34a deletion impairs T cell function in murine model of BM failure

Infusion of wild-type LN cells into sublethally irradiated, MHC-mismatched F1 recipients produced more severe BM hypoplasia compared to infusion of the same number of miR34a-deficient LN cells (Figure 6). The number of total BM karyocytes was reduced in the two infusion groups compared to the total body irradiation (TBI) only group, while no significant difference was found between the two infusion groups (*P* > 0.05; Figure 6A–6B). We also measured the hematopoietic stem and progenitor cells using the previously defined LSK markers, the destruction of which is a characteristic feature of BM failure. Infusion of wild-type LN cells resulted a more significant decrease in the percentage and the total number of LSK cells compared to mice that received miR34a-deficient LN cells

( $0.076 \pm 0.011\%$  vs  $0.118 \pm 0.046\%$ ,  $P = 0.043$ ;  $1.28 \pm 0.38 \times 10^3$  vs  $2.3 \pm 0.58 \times 10^3$ ,  $P = 0.011$ ; Figure 6B–6C). In both infusion groups, we observed a decline in white blood cell counts on day 3, platelet counts on day 7, and pancytopenia on day 12 (Supplementary Table S3).

Furthermore, infused wild-type LN cells expanded more vigorously in F1 recipient BMs than miR34a-deficient LN cells. The percentages of CD8<sup>+</sup> T cells in recipient BM after TBI + wild-type LN cell infusion and TBI + miR34a-deficient LN cell infusion were  $75.08 \pm 4.65\%$  and  $67.03 \pm 5.47\%$ , respectively ( $P = 0.037$ ; Figure 6D, 6E). No significant difference was found for CD4<sup>+</sup> T cells between the two LN cell infusion groups. Collectively, these data indicate that miR34a deficiency impairs the ability of T cells to proliferate and protects

against BM failure in an MHC-mismatched recipient environment.

## DISCUSSION

Extensive clinical and laboratory research suggests that acquired AA is a specific autoimmune disease for the aberrant T cell immune homeostasis. Our initial GeneChip assays of BM T cells identified 31 miRNAs with significantly differential expression between three SAA patients and three healthy individuals. In accordance with the results of peripheral blood T cells in Hosokawa's study [15], miR126 was observed to be down-regulated in our microarray analysis, however, its expression was at great variance and the difference between the 41 AA patients

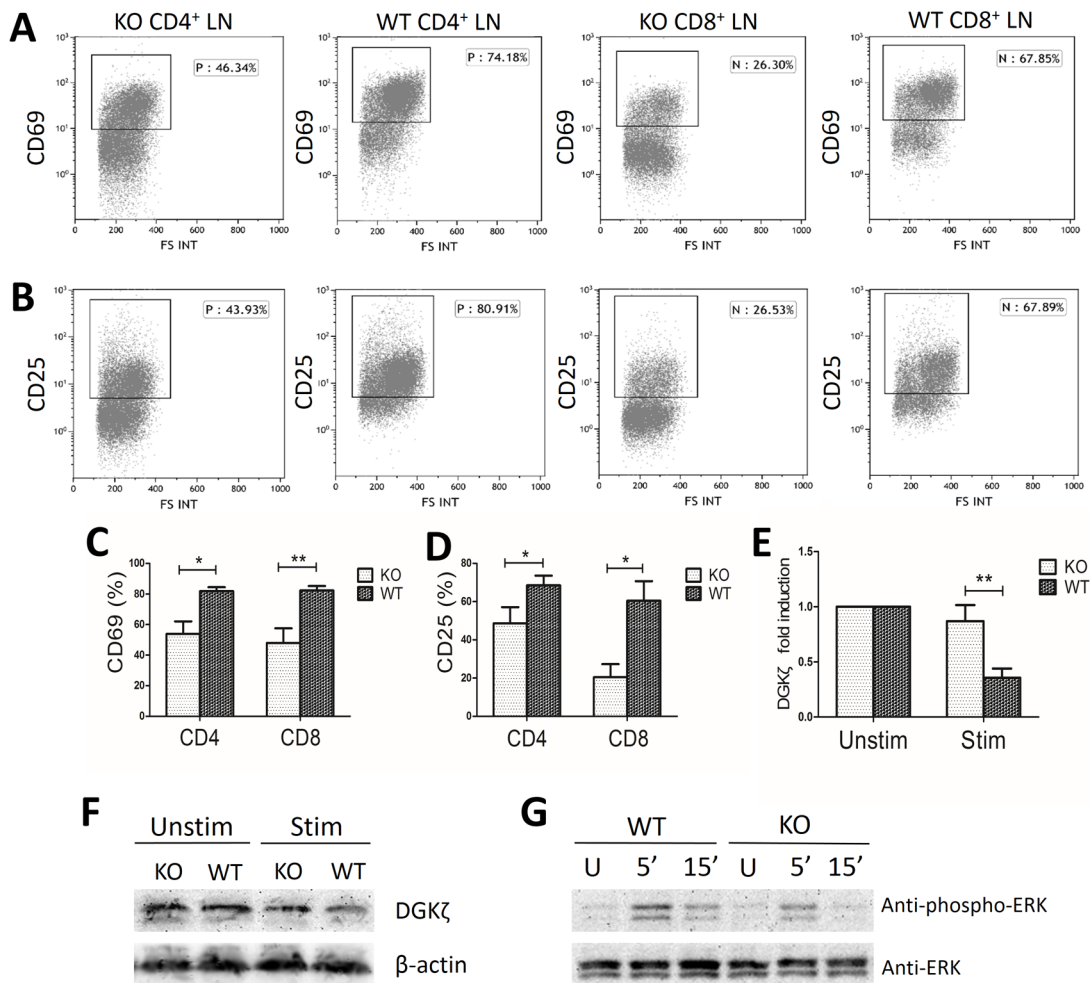

**Figure 4: Decreased activation markers and ERK phosphorylation in miR34a-deficient T cells.** WT, wild type; KO, miR34a-knockout; LN, lymph node. (A, C) Percentage of CD69<sup>+</sup> cells and (B, D) CD25<sup>+</sup> cells in LN CD4<sup>+</sup> and CD8<sup>+</sup> cells extracted from wild-type ( $n = 6$ ) and KO ( $n = 6$ ) mice after stimulation with anti-CD3 and anti-CD28 mAbs for 18h. (C and D: Mean  $\pm$  SEM.) (E) Fold induction of DGK $\zeta$  mRNA levels in KO ( $n = 6$ ) and wild-type ( $n = 6$ ) LN cells reflects the mRNA levels ( $2^{-(CT_{\text{Target}} - CT_{\text{Control}})}$ ) of stimulated cells divided by the mRNA levels of unstimulated cells (Mean  $\pm$  SEM). (F) Representative data of decreased DGK $\zeta$  protein expression in KO and wild-type LN cells after stimulation in three experiments. LN cells for immunoblot were extracted from nine WT and nine KO mice for one experiment. (G) Decreased ERK activation in miR34a-deficient LN cells after TCR engagement. LN cells from WT and KO mice were left unstimulated (U) or were stimulated with mAbs to CD3 and CD28 in 5 min and 15 min. Total ERK were determined as loading control. Data are representative of three experiments. LN cells for immunoblot were extracted from nine WT and nine KO mice for one experiment.  $P$  values were obtained by Student's  $t$ -tests. \* $P < 0.05$ ; \*\* $P < 0.01$ .

and 20 healthy controls was not significant, as analyzed by RT-PCR. The discrepancies might be due to the different miRNA expression in T cells between BM and peripheral blood, or due to the variation in miRNA profiles between different ethnic groups. miR34a was confirmed by RT-PCR to be overexpressed consistently in BMSCs of all the 41 patients. Besides, miR34a expression was higher in SAA than in MAA patients, also negatively correlated with peripheral blood neutrophil and reticulocyte counts in AA patients. These observations indicate that miR34a expression is closely related to AA. Notably, the early change of overexpressed miR34a in naïve T cells from AA patients further suggests that miR34a might contribute to the initiating events resulting in AA.

As an important downstream effector of p53, miR34a is a pro-apoptotic and growth-suppressive miRNA and often acts to mediate repression of many kinds of tumors [29]. In some hematological malignancies, miR34a is dysregulated and plays a role in the pathogenesis by repressing its target genes, such as SIRT1 and FOXP1 [24, 30]. Unlike miR155 and miR146, which have been reported to be aberrantly expressed in many autoimmune

diseases [31], little has been reported regarding miR34a. Agnieszka *et al.* detected significantly higher levels of serum IFN- $\gamma$  and miR34a in peripheral blood mononuclear cells from patients with pulmonary sarcoidosis [32]. miR34a was up-regulated in melanoma cells stimulated with IFN- $\gamma$ , the type 1 cytokine associated with autoimmune diseases and produced mostly by activated T cells [33, 34]. AA was considered an autoimmune disease in which BM destruction is mediated by effector cells, especially cytotoxic lymphocytes and type 1 cytokines. In present study, we transfected miR34a inhibitor lentivirus into T cells from AA patients. CD69 and CD25 expression on miR34a-inhibited T cells was lower than on control cells. Given this finding, miR34a up-regulation in T cells might partly explain the increased induction and activated state of T cells in AA.

DAG, a second messenger generated by phospholipase C $\gamma$ 1 activity upon TCR engagement, triggers several signaling cascades that play important roles in T cell development and function. DGK $\zeta$  is highly expressed in T cells and is a type of DGK that catalyzes the phosphorylation of DAG into phosphatidic acid.

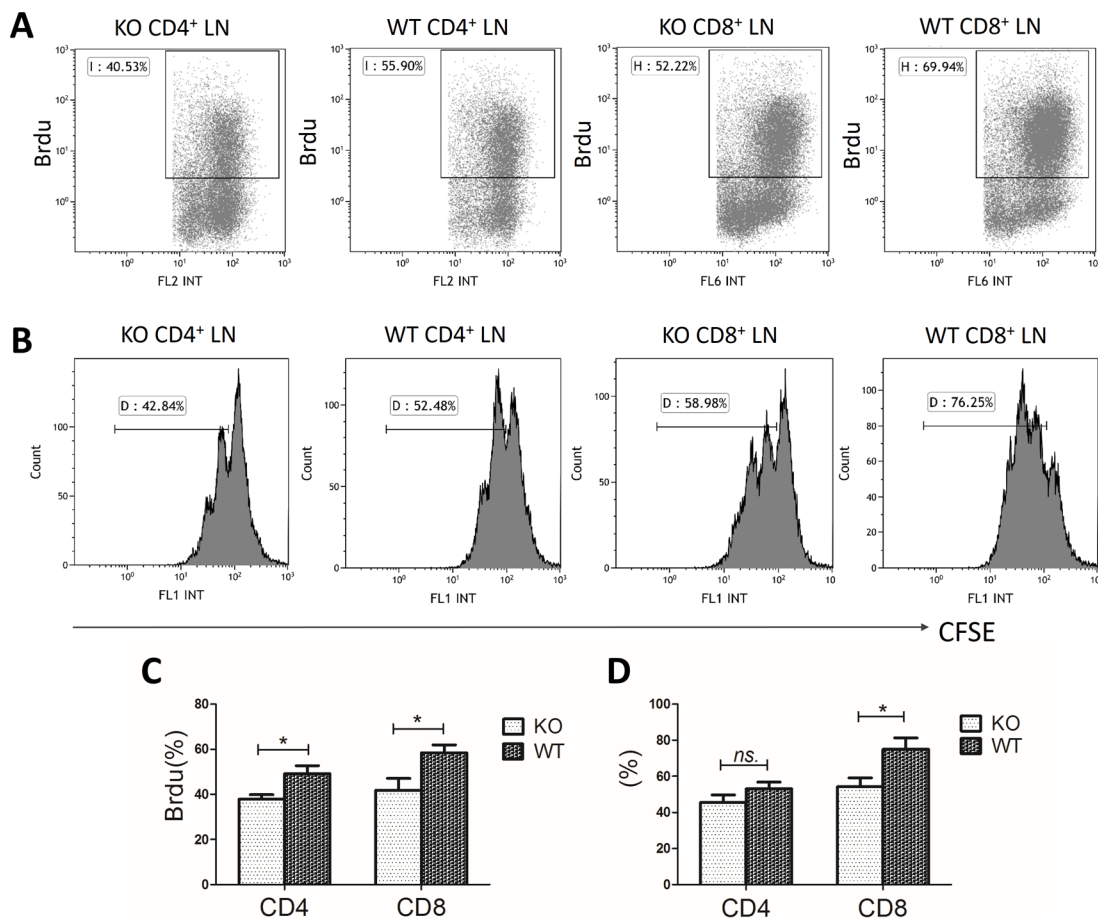

**Figure 5: Hypoproliferation of miR34a-deficient T cells.** WT, wild type; KO, miR34a- knockout; LN, lymph node. (A, C) BrdU incorporation rate in wild-type ( $n = 6$ ) and KO ( $n = 6$ ) LN cells after stimulation with anti-CD3 and anti-CD28 mAbs for 72 h. (B) Representative histograms of cell division by CFSE labeling with the same treatment as above. (D) Percentage of the divided cells.  $P$  values were obtained by Student's  $t$ -tests. Mean  $\pm$  SEM. \* $P < 0.05$ ; ns, no significance.

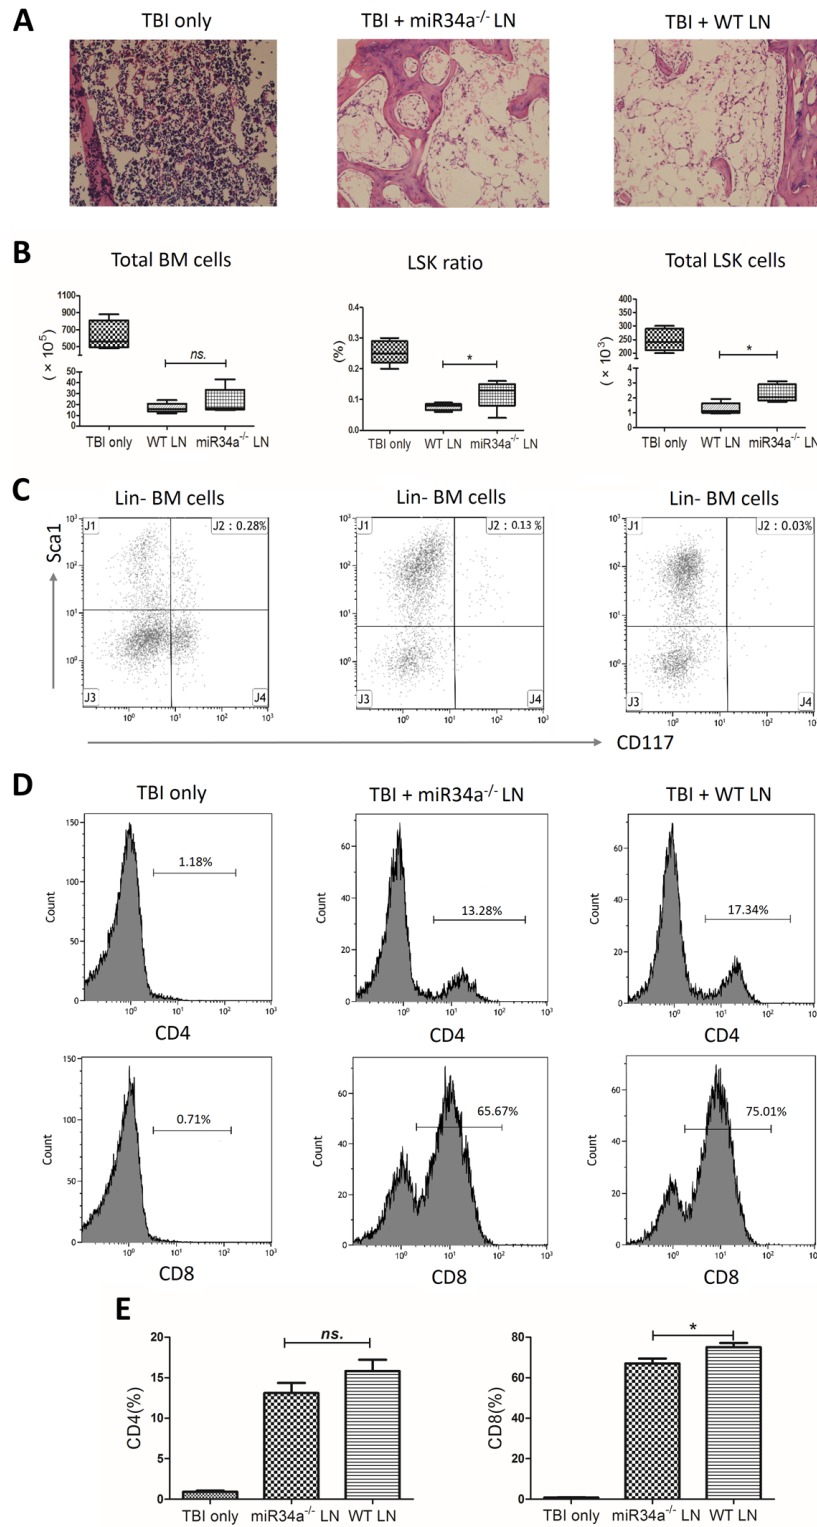

**Figure 6: Bone marrow failure model mediated by infusion of wild-type or miR34a<sup>-/-</sup> lymph node cells.** Lymph node (LN) cells from wild-type or miR34a<sup>-/-</sup> donors were used as effectors to induce BM failure in sublethally irradiated (5 Gy) CB6F1 recipient mice. F1 mice were treated with total body irradiation (TBI) only ( $n = 8$ ), TBI with wild-type (WT) LN cells ( $n = 12$ ), or TBI with miR34a<sup>-/-</sup> LN cells ( $n = 12$ ). Total BM cells were calculated assuming bilateral tibias, ilia, and unilateral femur contain 25% of total marrow cells. **(A)** Representative hematoxylin and eosin femur section (original magnification 200  $\times$ ). The three groups were compared in total BM cells, LSK cell percentage, and total LSK cells shown as medians with ranges **(B)** and representative scatterplots **(C)**. T cell expansions in the BM are shown as representative histograms **(D)** and means with SEMs **(E)**. Infused wild-type LN cells expanded more vigorously than miR34a<sup>-/-</sup> LN cells. Data are representative of three experiments. \* $P < 0.05$ ; ns, no significance.

DGK $\zeta$  acts as a breaking mechanism that terminates DAG-mediated signals and negatively regulates T cell activation [28]. Moreover, miR34a has been proved to enhance T cell activation by targeting DGK $\zeta$  in Jurkat cells [20]. Here, we found that DGK $\zeta$  mRNA expression in AA was reduced and negatively correlated with miR34a level. No significant differences were found in the mRNA levels of other potential or confirmed target genes. Furthermore, miR34a deficiency in murine LN cells attenuated the decrease in DGK $\zeta$  expression after stimulation. Together, these results indicate DGK $\zeta$  may be the working target gene of miR34a in T cells of AA patients. The elevated miR34a level represses DGK $\zeta$  expression in BM T cells of AA. Upon TCR stimulation DAG was generated from phospholipase C $\gamma$ 1 and phosphorylated less by the decreased DGK $\zeta$ , and resulted in the strengthened activation of downstream signaling pathways such as Ras-ERK, ultimately leading to enhanced T cell activation. CD69 and CD25 are activation markers up-regulated in an ERK-mediated manner after TCR ligation [35, 36]. Upon stimulation with anti-CD3 and anti-CD28 mAbs *in vitro*, CD4 $^{+}$  and CD8 $^{+}$  LN cells from miR34 $^{-/-}$  mice expressed much lower levels of CD69 and CD25 and proliferated less vigorously accompanied with reduced ERK phosphorylation than wild-type cells. Consistent with this result, stimulation of Jurkat T cells transduced with miR34a increased CD69 expression and ERK signaling [20].

In our murine model for LN cell-induced BM failure, we found that the miR34a-deficient LN cell infusion weakened CD8 cell expansion, increased the number of total BM hematopoietic stem and progenitor cells, and attenuated the severity of BM hypoplasia. In the model, no significant difference was found in CD4 $^{+}$  cell expansion. It is well known that a single microRNA can potentially regulate hundreds of proteins while being regulated by many genes [10]. Therefore, we speculate that the pro-apoptotic and growth-suppressive role of miR34a connected with the p53 network may be involved and have an opposite effect with DGK $\zeta$  in the BM failure model.

In the current study, we provide direct evidence of the regulatory roles of miR34a and DGK $\zeta$  in AA patients and in a murine model with miR34a $^{-/-}$  LN cell-mediated BM failure. In AA, high miR34a expression decreased DGK $\zeta$  level and enhanced T cell activation and proliferation. Targeting miR34a may represent a novel molecular therapeutic approach for patients with AA.

## MATERIALS AND METHODS

### Ethics statement

Investigation has been conducted in accordance with the ethical standards and the national and international guidelines. The clinical study was approved by the Medical Ethics Committee of Qilu Hospital, Shandong University. Written informed consents were obtained from all patients

and controls in accordance with the Helsinki Declaration. All animal study protocols were approved by the Animal Ethics Committee of Shandong University School of Medicine.

### Patients and controls

Forty-nine AA patients, 33 with severe AA (SAA) and 16 with moderate AA (MAA), were evaluated at the Department of Hematology, Qilu Hospital, Shandong University, from March 2012 to September 2016. The diagnosis and severity evaluation of AA was established according to the criteria of Camitta *et al.* [37]. All patients were newly diagnosed and without any specific treatment prior to sampling. Twenty eight healthy individuals served as the control group. The clinical characteristics of AA patients and healthy controls, including age, sex, clinical subtypes, neutrophil, platelet, and reticulocyte counts were summarized in Supplementary Table S1.

### Mice

Inbred C57BL/6 (B6, *H2<sup>b/b</sup>*) mice were obtained from the Center for New Drug Evaluation of Shandong University, hybrid CB6F1 (F1, *H2<sup>b/d</sup>*) mice from Vital River Laboratory Animal Technology Co. Ltd (Beijing, China), and induced mutant B6 (Cg)-miR34a<sup>mi11.Lhe/J</sup> (miR34a $^{-/-}$ ) mice from Jackson Laboratory (Bar Harbor, Maine, USA). All animal experiments were carried out in accordance with the National Institutes of Health guide for the care and use of laboratory animals.

### Affymetrix GeneChip miRNA assay

CD3 $^{+}$  cells in bone marrow mononuclear cells (BMMCs) were positively selected from three SAA patients and three healthy controls using an immunomagnetic activated cell sorting system (Miltenyi, Bergisch Gladbach, Germany). Purity of CD3 $^{+}$  cells was 93% to 97% according to flow cytometry analysis. Affymetrix GeneChip microRNA 2.0 Array was used for detection of miRNA expression in the six samples.

### Quantitative RT-PCR analysis

CD3 $^{+}$ CD45RA $^{+}$ CD45RO $^{-}$  naïve T cells and CD3 $^{+}$ CD45RA $^{-}$ CD45RO $^{+}$  non-naïve T cells were isolated from BMMCs by negative selection with immunomagnetic beads. Total RNA was extracted and converted into cDNA, as described in supplemental data. The primer sequences of KLF4, LEF1, SPI1, NR4A2, SIRT1, CDK6, DGK $\zeta$  and  $\beta$ -ACTIN were shown in Supplementary Table S2.

### Fluorescence-activated cell sorter analysis

The details about cell staining with fluorescence-labeled monoclonal antibodies (mAbs) were described in supplemental data.

## Lentivirus transfection

The recombinant lentivirus LV3-miR34a inhibitor and LV3-NC were purchased from GenePharma (Shanghai, China). The BMMCs obtained from AA patients were cultured in Dulbecco's modified eagle medium (DMEM) supplemented with 10% fetal bovine serum (FBS) and were transfected with LV3-miR34a inhibitor and LV3-NC plus 5 µg/mL polybrene, 1 µg/mL of anti-CD3 mAb, 0.5 µg/mL of anti-CD28 mAb, and 50 U/mL of recombinant human IL-2. Cells with GFP were observed under fluorescence microscope and collected 5 days after transfection.

## T cell activation and proliferation assays

Lymph node cells and splenocytes from miR34a<sup>-/-</sup> and wild-type mice were left unstimulated or were stimulated with anti-CD3ε and anti-CD28 mAbs (in DMEM, 10% FBS; 18 h). A part of LN cells and splenocytes were used to analyze the T cell activation markers CD69 and CD25 by flow cytometry, while the left were collected to measure the mRNA level of DGKζ. LN cells from nine mice were collected with the same treatment as above to examine the protein level of DGKζ. For proliferation assays, 5-Bromo-2-deoxyuridine (BrdU) and carboxyfluorescein diacetate succinimidyl ester (CFSE) were added to the cell culture, as described in the supplemental data.

## Immunoblot analysis

DGKζ protein level in SAA patients and ERK activation after TCR engagement in LN cells from miR34a<sup>-/-</sup> mice and wild-type mice were determined by immunoblot. The method was described in detail in the supplemental data.

## Induction of a murine model of bone marrow failure

Recipient CB6F1 mice were pre-irradiated with 5 Gy total body irradiation. Four to six hours later, mice were injected with MHC-mismatched LN (5 × 10<sup>6</sup> wild-type or miR34a<sup>-/-</sup>) cells through the lateral tail vein [38, 39]. Control mice received 5 Gy TBI only. All mice were bled from the angular vein on day 0 (LN cell infusion day), 3, 7, and 12 as described by Tang *et al.* [38]. Peripheral blood cell counts were performed to observe whether pancytopenia had developed. Treated mice received normal care and nutrition until they died or were euthanized on day 12 to collect tissues for analyses.

## Statistics

All analyses of frequencies, proliferations, cell counts, and mRNA expression for statistically significant

differences between two groups were determined by 2-tailed Student's *t*-tests. Comparisons among three groups were performed using one-way ANOVA, followed by the least significant difference (LSD) test. Differences between LV3-miR34a inhibitor and LV3-NC transfection groups were determined by paired sample *t*-test. The correlation analyses were assessed by Spearman's test. Results were presented as mean ± SD. *P* values less than 0.05 were considered statistically significant. All statistical analyses were performed with SPSS18 software.

## Abbreviations

DGK, diacylglycerol kinase; AA, aplastic anemia; BM, bone marrow; BMMCs, bone marrow mononuclear cells; miRNAs, microRNAs; RT-PCR, real time-polymerase chain reaction; DAG, diacylglycerol; Ras-ERK, Ras-extracellular signal regulated kinase; TCR, T cell receptor; KLF4, Kruppel-like factor 4; LEF1, lymphoid enhancer binding factor 1; SPI1, SPI-1 proto-oncogene; NR4A2, nuclear receptor subfamily 4 group A member 2; SIRT1, sirtuin 1; CDK6, cyclin-dependent kinase 6; LV3-miR34a inhibitor, lentivirus carrying miR34a inhibitor sequences; LV3-NC, lentivirus carrying non-specific sequences; GFP, green fluorescent protein; LSK, Lin<sup>-</sup>Sca1<sup>+</sup>CD117<sup>+</sup>; LN, lymph node.

## ACKNOWLEDGMENTS

The author would like to thank Dr. Yong-gang Yao (Kunming Institute of Zoology, Chinese Academy of Sciences, Kunming, Yunnan, China) for his valuable suggestions and critically reading the manuscript. This work was supported by grants from the Major Research plan of the National Natural Science Foundation of China (No. 91442204), National Natural Science Foundation for Distinguished Young Scholars of China (No. 81125002), National Natural Science Foundation of China (No. 81370623, No.81400087), State Program of National Natural Science Foundation of China for Innovative Research Group (No. 81321061), and State Key Clinical Specialty of China for Blood Disorders.

## CONFLICTS OF INTEREST

The authors declare no competing financial interests.

## Authors' contributions

J.P. designed research, performed research, analyzed data and wrote the paper; Y.-x.S. and H.L. performed research, analyzed data and wrote the paper; Q.F., X.L., Y.-y.Y., G.-s.L., L.-w.Z., Y.G. and J.R. performed research and analyzed data; C.-j.G. and C.-h.M performed research.

## REFERENCES

1. Young NS. Current concepts in the pathophysiology and treatment of aplastic anemia. *Hematology Am Soc Hematol Educ Program*. 2013; 2013:76–81. doi: 10.1182/asheducation-2013.1.76.
2. Young NS. Pathophysiologic mechanisms in acquired aplastic anemia. *Hematology Am Soc Hematol Educ Program*. 2006:72–7. doi: 10.1182/asheducation-2006.1.72.
3. Nakao S, Feng X, Sugimori C. Immune pathophysiology of aplastic anemia. *Int J Hematol*. 2005; 82:196–200. doi: 10.1532/IJH97.05116.
4. Li B, Liu S, Niu Y, Fang S, Wu X, Yu Z, Chen S, Yang L, Li Y. Altered expression of the TCR signaling related genes CD3 and FcεpsilonR1γ in patients with aplastic anemia. *J Hematol Oncol*. 2012; 5:6. doi: 10.1186/1756-8722-5-6.
5. Passweg JR, Tichelli A. Immunosuppressive treatment for aplastic anemia: are we hitting the ceiling? *Haematologica*. 2009; 94:310–2. doi: 10.3324/haematol.2008.002329.
6. Scheinberg P, Young NS. How I treat acquired aplastic anemia. *Blood*. 2012; 120:1185–96. doi: 10.1182/blood-2011-12-274019.
7. Zeng Y, Katsanis E. The complex pathophysiology of acquired aplastic anaemia. *Clin Exp Immunol*. 2015; 180:361–70. doi: 10.1111/cei.12605.
8. Friedman RC, Farh KK, Burge CB, Bartel DP. Most mammalian mRNAs are conserved targets of microRNAs. *Genome Res*. 2009; 19:92–105. doi: 10.1101/gr.082701.108.
9. Miranda KC, Huynh T, Tay Y, Ang YS, Tam WL, Thomson AM, Lim B, Rigoutsos I. A pattern-based method for the identification of MicroRNA binding sites and their corresponding heteroduplexes. *Cell*. 2006; 126:1203–17. doi: 10.1016/j.cell.2006.07.031.
10. Baek D, Villen J, Shin C, Camargo FD, Gygi SP, Bartel DP. The impact of microRNAs on protein output. *Nature*. 2008; 455:64–71. doi: 10.1038/nature07242.
11. Lim LP, Lau NC, Garrett-Engle P, Grimson A, Schelter JM, Castle J, Bartel DP, Linsley PS, Johnson JM. Microarray analysis shows that some microRNAs downregulate large numbers of target mRNAs. *Nature*. 2005; 433:769–73. doi: 10.1038/nature03315.
12. Lu MC, Lai NS, Chen HC, Yu HC, Huang KY, Tung CH, Huang HB, Yu CL. Decreased microRNA(miR)-145 and increased miR-224 expression in T cells from patients with systemic lupus erythematosus involved in lupus immunopathogenesis. *Clin Exp Immunol*. 2013; 171:91–9. doi: 10.1111/j.1365-2249.2012.04676.x.
13. Mookherjee N, El-Gabalawy HS. High degree of correlation between whole blood and PBMC expression levels of miR-155 and miR-146a in healthy controls and rheumatoid arthritis patients. *J Immunol Methods*. 2013; 400–401:106–10. doi: 10.1016/j.jim.2013.10.001.
14. O'Connell RM, Rao DS, Chaudhuri AA, Baltimore D. Physiological and pathological roles for microRNAs in the immune system. *Nat Rev Immunol*. 2010; 10:111–22. doi: 10.1038/nri2708.
15. Hosokawa K, Muranski P, Feng X, Keyvanfar K, Townsley DM, Dumitriu B, Chen J, Kajigaya S, Taylor JG, Hourigan CS, Barrett AJ, Young NS. Identification of novel microRNA signatures linked to acquired aplastic anemia. *Haematologica*. 2015; 100:1534–45. doi: 10.3324/haematol.2015.126128.
16. Ren J, Hou XY, Ma SH, Zhang FK, Zhen JH, Sun L, Sun YX, Hao YL, Cheng YF, Hou M, Xu CG, Zhang MH, Peng J. Elevated expression of CX3C chemokine receptor 1 mediates recruitment of T cells into bone marrow of patients with acquired aplastic anaemia. *J Intern Med*. 2014; 276:512–24. doi: 10.1111/joim.12218.
17. Maciejewski JP, Hibbs JR, Anderson S, Katevas P, Young NS. Bone marrow and peripheral blood lymphocyte phenotype in patients with bone marrow failure. *Exp Hematol*. 1994; 22:1102–10.
18. Raver-Shapira N, Marciano E, Meiri E, Spector Y, Rosenfeld N, Moskovits N, Bentwich Z, Oren M. Transcriptional activation of miR-34a contributes to p53-mediated apoptosis. *Mol Cell*. 2007; 26:731–43. doi: 10.1016/j.molcel.2007.05.017.
19. Chang TC, Wentzel EA, Kent OA, Ramachandran K, Mullendore M, Lee KH, Feldmann G, Yamakuchi M, Ferlito M, Lowenstein CJ, Arking DE, Beer MA, Maitra A, et al. Transactivation of miR-34a by p53 broadly influences gene expression and promotes apoptosis. *Mol Cell*. 2007; 26:745–52. doi: 10.1016/j.molcel.2007.05.010.
20. Shin J, Xie D, Zhong XP. MicroRNA-34a enhances T cell activation by targeting diacylglycerol kinase zeta. *PLoS One*. 2013; 8:e77983. doi: 10.1371/journal.pone.0077983.
21. Zhong XP, Hainey EA, Olenchock BA, Jordan MS, Maltzman JS, Nichols KE, Shen H, Koretzky GA. Enhanced T cell responses due to diacylglycerol kinase zeta deficiency. *Nat Immunol*. 2003; 4:882–90. doi: 10.1038/ni958.
22. Joshi RP, Schmidt AM, Das J, Pytel D, Riese MJ, Lester M, Diehl JA, Behrens EM, Kambayashi T, Koretzky GA. The zeta isoform of diacylglycerol kinase plays a predominant role in regulatory T cell development and TCR-mediated ras signaling. *Sci Signal*. 2013; 6:ra102. doi: 10.1126/scisignal.2004373.
23. Guo R, Wan CK, Carpenter JH, Mousallem T, Boustany RM, Kuan CT, Burks AW, Zhong XP. Synergistic control of T cell development and tumor suppression by diacylglycerol kinase alpha and zeta. *Proc Natl Acad Sci USA*. 2008; 105:11909–14. doi: 10.1073/pnas.0711856105.
24. Tang R, Li J, Yue M, Liu Z, Feng S, Tang S, Wang T. A correlation analysis of miRNA34a and its predicted target genes in leukemia. *Mol Med Rep*. 2014; 9:1283–8. doi: 10.3892/mmr.2014.1931.
25. Votavova H, Grmanova M, Dostalova Merkerova M, Belickova M, Vasikova A, Neuwirtova R, Cermak J. Differential expression of microRNAs in CD34+ cells of 5q- syndrome. *J Hematol Oncol*. 2011; 4:1. doi: 10.1186/1756-8722-4-1.

26. Dweep H, Gretz N, Sticht C. miRWalk database for miRNA-target interactions. *Methods Mol Biol.* 2014; 1182:289–305. doi: 10.1007/978-1-4939-1062-5\_25.
27. Mayle A, Luo M, Jeong M, Goodell MA. Flow cytometry analysis of murine hematopoietic stem cells. *Cytometry A.* 2013; 83:27–37. doi: 10.1002/cyto.a.22093.
28. Zhong XP, Hainey EA, Olenchock BA, Zhao H, Topham MK, Koretzky GA. Regulation of T cell receptor-induced activation of the Ras-ERK pathway by diacylglycerol kinase zeta. *J Biol Chem.* 2002; 277:31089–98. doi: 10.1074/jbc.M203818200.
29. Yamakuchi M, Lowenstein CJ. MiR-34, SIRT1 and p53: the feedback loop. *Cell Cycle.* 2009; 8:712–5. doi: 10.4161/cc.8.5.7753.
30. Wang X, Li J, Dong K, Lin F, Long M, Ouyang Y, Wei J, Chen X, Weng Y, He T, Zhang H. Tumor suppressor miR-34a targets PD-L1 and functions as a potential immunotherapeutic target in acute myeloid leukemia. *Cell Signal.* 2015; 27:443–52. doi: 10.1016/j.cellsig.2014.12.003.
31. O'Connell RM, Rao DS, Baltimore D. microRNA regulation of inflammatory responses. *Annu Rev Immunol.* 2012; 30:295–312. doi: 10.1146/annurev-immunol-020711-075013.
32. Jazwa A, Kasper L, Bak M, Sobczak M, Szade K, Jozkowicz A, Sladek K, Dulak J. Differential inflammatory microRNA and cytokine expression in pulmonary sarcoidosis. *Arch Immunol Ther Exp (Warsz).* 2015; 63:139–46. doi: 10.1007/s00005-014-0315-9.
33. Reinsbach S, Nazarov PV, Philippidou D, Schmitt M, Wienecke-Baldacchino A, Muller A, Vallar L, Behrmann I, Kreis S. Dynamic regulation of microRNA expression following interferon-gamma-induced gene transcription. *RNA Biol.* 2012; 9:978–89. doi: 10.4161/rna.20494.
34. Young HA, Hardy KJ. Interferon-gamma: producer cells, activation stimuli, and molecular genetic regulation. *Pharmacol Ther.* 1990; 45:137–51. doi:
35. D'Ambrosio D, Cantrell DA, Frati L, Santoni A, Testi R. Involvement of p21ras activation in T cell CD69 expression. *Eur J Immunol.* 1994; 24:616–20. doi: 10.1002/eji.1830240319.
36. Castellanos MC, Munoz C, Montoya MC, Lara-Pezzi E, Lopez-Cabrera M, de Landazuri MO. Expression of the leukocyte early activation antigen CD69 is regulated by the transcription factor AP-1. *J Immunol.* 1997; 159:5463–73.
37. Camitta BM, Thomas ED, Nathan DG, Santos G, Gordon-Smith EC, Gale RP, Rapoport JM, Storb R. Severe aplastic anemia: a prospective study of the effect of early marrow transplantation on acute mortality. *Blood.* 1976; 48:63–70.
38. Tang Y, Desierto MJ, Chen J, Young NS. The role of the Th1 transcription factor T-bet in a mouse model of immune-mediated bone-marrow failure. *Blood.* 2010; 115:541–8. doi: 10.1182/blood-2009-03-211383.
39. Omokaro SO, Desierto MJ, Eckhaus MA, Ellison FM, Chen J, Young NS. Lymphocytes with aberrant expression of Fas or Fas ligand attenuate immune bone marrow failure in a mouse model. *J Immunol.* 2009; 182:3414–22. doi: 10.4049/jimmunol.0801430.
